# Supplementary material for: Changes in Biomarkers of Tobacco Exposure among Cigarette Smokers Transitioning to ENDS Use: The Population Assessment of Tobacco and Health Study, 2013–2015
Source: MDPI journal article supplement (doi:10.3390/ijerph19031462), 2022-01-27
Supplement: s1 [file s1]

**Table S1. Geometric mean biomarker concentrations and 95% CIs by Wave 2 tobacco use status, among Wave 1 exclusive cigarette smokers, PATH Study (2013-2015).**

|                                                 | Exclusive Cigarette Smoking<br>(N = 1479) |                  | Dual Cigarette/ENDS Use<br>(N = 204) |                  | Exclusive ENDS Use<br>(N = 28) <sup>†</sup> |                 | No Tobacco Use<br>(N = 188) |               |
|-------------------------------------------------|-------------------------------------------|------------------|--------------------------------------|------------------|---------------------------------------------|-----------------|-----------------------------|---------------|
| Biomarker                                       | Wave 1                                    | Wave 2           | Wave 1                               | Wave 2           | Wave 1                                      | Wave 2          | Wave 1                      | Wave 2        |
| Urinary Nicotine Metabolites (ug/g creatinine)  |                                           |                  |                                      |                  |                                             |                 |                             |               |
| Nicotine Equivalence (TNE2) (μmol/g creatinine) |                                           |                  |                                      |                  |                                             |                 |                             |               |
| Mean                                            | 31.5                                      | 31.2             | 42.3                                 | 38.5             | 25.1                                        | 9.1*            | 2.3 <sup>†</sup>            | 0.1*          |
| (95% CI)                                        | (28.0, 35.5)                              | (28.0, 34.8)     | (35.1, 50.9)                         | (30.3, 48.9)     | (15.3, 41.0)                                | (3.6, 22.9)     | (1.0, 5.4)                  | (0.0, 0.1)    |
| p-value                                         |                                           | 0.34             |                                      | 0.31             |                                             | 0.0093          |                             | <.0001        |
| % change                                        |                                           | -1.1%            |                                      | -8.9%            |                                             | -63.9%          |                             | -97.0%        |
| trans-3'-Hydroxycotinine (HCTT)                 |                                           |                  |                                      |                  |                                             |                 |                             |               |
| Mean                                            | 3528.7                                    | 3483.5           | 4746.8                               | 4365.7           | 2503.9                                      | 933.1*          | 258.7                       | 8.2*          |
| (95% CI)                                        | (3091.1, 4028.3)                          | (3074.2, 3947.2) | (3942.0, 5716.0)                     | (3384.0, 5632.2) | (1453.9, 4312)                              | (346.9, 2510.2) | (110.6, 605.3)              | (4.8, 14.2)   |
| p-value                                         |                                           | 0.39             |                                      | 0.41             |                                             | 0.011           |                             | <.0001        |
| % change                                        |                                           | -1.3%            |                                      | -8.0%            |                                             | -62.7%          |                             | -96.8%        |
| Cotinine (COTT)                                 |                                           |                  |                                      |                  |                                             |                 |                             |               |
| Mean                                            | 2008.2                                    | 1970.3           | 2856.1                               | 2510.0           | 1752.6                                      | 579.7*          | 153.6                       | 4.5*          |
| (95% CI)                                        | (1792.9, 2249.2)                          | (1778.0, 2183.4) | (2341.3, 3484.1)                     | (1980.0, 3181.9) | (984.4, 3120.2)                             | (223.3, 1505)   | (64.1, 367.8)               | (2.6, 7.7)    |
| p-value                                         |                                           | 0.17             |                                      | 0.13             |                                             | 0.0063          |                             | <.0001        |
| % change                                        |                                           | -1.9%            |                                      | -12.1%           |                                             | -66.9%          |                             | -97.1%        |
| Nicotine (NICT)                                 |                                           |                  |                                      |                  |                                             |                 |                             |               |
| Mean                                            | 1170.8                                    | 1239.7           | 1381.2                               | 1535.9           | 1053.4                                      | 294.1*          | 619.8                       | 88.3*         |
| (95% CI)                                        | (1020.1, 1343.8)                          | (1093.0, 1405.9) | (1067.1, 1787.8)                     | (1260.1, 1871.9) | (542.4, 2046.0)                             | (140.0, 618.1)  | (256.4, 1498.2)             | (30.5, 255.9) |
| p-value                                         |                                           | 0.37             |                                      | 0.30             |                                             | 0.0024          |                             | 0.0045        |
| % change                                        |                                           | 5.9%             |                                      | 11.2%            |                                             | -72.1%          |                             | -85.7%        |
| Cotinine N-oxide (COXT)                         |                                           |                  |                                      |                  |                                             |                 |                             |               |
| Mean                                            | 320.4                                     | 329.5            | 387.1                                | 384.3            | 278.8                                       | 144.7           | 206.9                       | 25.7*         |
| (95% CI)                                        | (295.4, 347.5)                            | (309.4, 350.9)   | (339.1, 441.9)                       | (328.6, 449.4)   | (197.9, 392.9)                              | (70.6, 296.6)   | (112.3, 381.2)              | (7.4, 88.5)   |
| p-value                                         |                                           | 0.45             |                                      | 0.97             |                                             | 0.091           |                             | 0.0041        |
| % change                                        |                                           | 2.8%             |                                      | -0.7%            |                                             | -48.1%          |                             | -87.6%        |
| Nicotine 1'-oxide (NOXT)                        |                                           |                  |                                      |                  |                                             |                 |                             |               |
| Mean                                            | 352.1                                     | 357.7            | 435.6                                | 461.7            | 402.7                                       | 142.0           | 185.3                       | 20.5          |
| (95% CI)                                        | (318.5, 389.3)                            | (324.1, 394.8)   | (353, 537.4)                         | (388.6, 548.6)   | (237.4, 682.9)                              | (73.1, 275.9)   | (75.4, 455.2)               | (4.9, 85.5)   |
| p-value                                         |                                           | 0.90             |                                      | 0.33             |                                             | 0.0032          |                             | 0.016         |
| % change                                        |                                           | 1.6%             |                                      | 6.0%             |                                             | -64.7%          |                             | -88.9%        |
| Nornicotine (NNCT)                              |                                           |                  |                                      |                  |                                             |                 |                             |               |

|                                                                | Exclusive Cigarette Smoking<br>(N = 1479) |                | Dual Cigarette/ENDS Use<br>(N = 204) |                | Exclusive ENDS Use<br>(N = 28)+ |             | No Tobacco Use<br>(N = 188) |             |
|----------------------------------------------------------------|-------------------------------------------|----------------|--------------------------------------|----------------|---------------------------------|-------------|-----------------------------|-------------|
| Biomarker                                                      | Wave 1                                    | Wave 2         | Wave 1                               | Wave 2         | Wave 1                          | Wave 2      | Wave 1                      | Wave 2      |
| Mean                                                           | 64.3                                      | 66.8           | 73.9                                 | 73.5           | 60.1                            | 18.9*       | 36.9                        | 7.4*        |
| (95% CI)                                                       | (58.2, 71.1)                              | (60.9, 73.4)   | (61.7, 88.5)                         | (63.7, 84.8)   | (40.5, 89.2)                    | (10.6, 34)  | (18.6, 72.9)                | (3.0, 18.1) |
| p-value                                                        |                                           | 0.38           |                                      | 0.91           |                                 | 0.0024      |                             | 0.0052      |
| % change                                                       |                                           | 3.9%           |                                      | -0.6%          |                                 | -68.5%      |                             | -80.0%      |
| <b>Minor Tobacco Alkaloids (ug/g creatinine)</b>               |                                           |                |                                      |                |                                 |             |                             |             |
| <b>Anabasine (ANBT)</b>                                        |                                           |                |                                      |                |                                 |             |                             |             |
| Mean                                                           | 8.5                                       | 8.4            | 9.4                                  | 8.3            | 7.6                             | 0.8*†       | 4.6                         | 1.2*†       |
| (95% CI)                                                       | (7.6, 9.4)                                | (7.6, 9.2)     | (7.7, 11.5)                          | (6.9, 10.0)    | (4.7, 12.3)                     | (0.4, 1.7)  | (2.7, 8.1)                  | (0.6, 2.6)  |
| p-value                                                        |                                           | 0.29           |                                      | 0.27           |                                 | <.0001      |                             | 0.0039      |
| % change                                                       |                                           | -1.2%          |                                      | -11.9%         |                                 | -88.9%      |                             | -74.1%      |
| <b>Anatabine (ANTT)</b>                                        |                                           |                |                                      |                |                                 |             |                             |             |
| Mean                                                           | 14.1                                      | 14.5           | 16.1                                 | 13.9           | 12.4                            | 0.7*†       | 7.0                         | 1.3*†       |
| (95% CI)                                                       | (12.5, 15.9)                              | (13.0, 16.3)   | (12.9, 20.2)                         | (11.0, 17.7)   | (7.1, 21.7)                     | (0.4, 1.6)  | (3.7, 13.2)                 | (0.5, 3.3)  |
| p-value                                                        |                                           | 0.56           |                                      | 0.31           |                                 | <.0001      |                             | 0.0029      |
| % change                                                       |                                           | 3.5%           |                                      | -13.7%         |                                 | -94.0%      |                             | -81.9%      |
| <b>Tobacco Specific Nitrosamines (TSNAs) (ng/g creatinine)</b> |                                           |                |                                      |                |                                 |             |                             |             |
| <b>4-methylnitrosamino)-4-(3-pyridyl)-1-butanol (NNAL)</b>     |                                           |                |                                      |                |                                 |             |                             |             |
| Mean                                                           | 216.9                                     | 218.1          | 272.0                                | 231.9*         | 172.5                           | 12.5*       | 33.5                        | 5.0*        |
| (95% CI)                                                       | (195.9, 240.2)                            | (199.2, 238.8) | (226.5, 326.6)                       | (187.0, 287.5) | (110.2, 269.8)                  | (5.7, 27.3) | (18.7, 60.2)                | (3.6, 7.0)  |
| p-value                                                        |                                           | 0.52           |                                      | 0.037          |                                 | <.0001      |                             | <.0001      |
| % change                                                       |                                           | 0.5%           |                                      | -14.8%         |                                 | -92.8%      |                             | -85.0%      |
| <b>N'-Nitrosonornicotine (NNN)</b>                             |                                           |                |                                      |                |                                 |             |                             |             |
| Mean                                                           | 11.9                                      | 11.6           | 14.9                                 | 12.9           | 15.3                            | 2.6*        | 4.9                         | 2.7*        |
| (95% CI)                                                       | (10.9, 12.9)                              | (10.4, 13)     | (10.8, 20.5)                         | (9.7, 17.2)    | (10.3, 22.7)                    | (1.5, 4.4)  | (3.4, 7.0)                  | (2.3, 3.2)  |
| p-value                                                        |                                           | 0.23           |                                      | 0.15           |                                 | <.0001      |                             | <.0001      |
| % change                                                       |                                           | -1.9%          |                                      | -13.4%         |                                 | -83.3%      |                             | -44.4%      |
| <b>N'-nitrosoanatabine (NAT)</b>                               |                                           |                |                                      |                |                                 |             |                             |             |
| Mean                                                           | 97.9                                      | 104.9          | 132.0                                | 115.4          | 55.5                            | 3.1*        | 19.8                        | 4.9*        |
| (95% CI)                                                       | (86.1, 111.4)                             | (93.4, 117.7)  | (101.5, 171.7)                       | (89.7, 148.6)  | (18.5, 166.1)                   | (1.9, 5.1)  | (12, 32.8)                  | (3.9, 6.2)  |
| p-value                                                        |                                           | 0.23           |                                      | 0.29           |                                 | <.0001      |                             | <.0001      |
| % change                                                       |                                           | 7.1%           |                                      | -12.6%         |                                 | -94.4%      |                             | -75.2%      |
| <b>N'-nitrosoanabasine (NAB)</b>                               |                                           |                |                                      |                |                                 |             |                             |             |
| Mean                                                           | 16.0                                      | 15.8           | 21.0                                 | 17.2*          | 10.3                            | 1.2*†       | 4.5                         | 1.6*        |

|                                       | Exclusive Cigarette Smoking<br>(N = 1479) |                  | Dual Cigarette/ENDS Use<br>(N = 204) |                  | Exclusive ENDS Use<br>(N = 28)+ |                 | No Tobacco Use<br>(N = 188) |                  |
|---------------------------------------|-------------------------------------------|------------------|--------------------------------------|------------------|---------------------------------|-----------------|-----------------------------|------------------|
| Biomarker                             | Wave 1                                    | Wave 2           | Wave 1                               | Wave 2           | Wave 1                          | Wave 2          | Wave 1                      | Wave 2           |
| (95% CI)                              | (14.1, 18.1)                              | (14.1, 17.6)     | (16.5, 26.6)                         | (14.0, 21.1)     | (4.1, 25.7)                     | (0.7, 1.9)      | (3.1, 6.8)                  | (1.3, 1.9)       |
| p-value                               |                                           | 0.45             |                                      | 0.041            |                                 | <.0001          |                             | <.0001           |
| % change                              |                                           | -1.1%            |                                      | -18.0%           |                                 | -88.7%          |                             | -65.4%           |
| <b>Heavy Metals (ug/g creatinine)</b> |                                           |                  |                                      |                  |                                 |                 |                             |                  |
| <b>Beryllium</b>                      |                                           |                  |                                      |                  |                                 |                 |                             |                  |
| Mean                                  | 0.01                                      | 0.01*            | 0.01                                 | 0.01*            | 0.01                            | 0.01            | 0.01                        | 0.01*            |
| (95% CI)                              | (0.01, 0.01)                              | (0.01, 0.01)     | (0.01, 0.01)                         | (0.01, 0.01)     | (0.01, 0.01)                    | (0.01, 0.01)    | (0.01, 0.02)                | (0.01, 0.01)     |
| p-value                               |                                           | 0.0006           |                                      | 0.041            |                                 | 0.71            |                             | 0.043            |
| % change                              |                                           | 0.0%             |                                      | 0.0%             |                                 | 0.0%            |                             | 0.0%             |
| <b>Cadmium</b>                        |                                           |                  |                                      |                  |                                 |                 |                             |                  |
| Mean                                  | 0.30                                      | 0.32             | 0.29                                 | 0.29             | 0.20                            | 0.20            | 0.19                        | 0.19             |
| (95% CI)                              | (0.28, 0.33)                              | (0.29, 0.34)     | (0.25, 0.35)                         | (0.23, 0.35)     | (0.13, 0.30)                    | (0.14, 0.30)    | (0.16, 0.23)                | (0.16, 0.23)     |
| p-value                               |                                           | 0.17             |                                      | 0.82             |                                 | 0.46            |                             | 0.66             |
| % change                              |                                           | 6.7%             |                                      | 0.0%             |                                 | 0.0%            |                             | 0.0%             |
| <b>Cobalt</b>                         |                                           |                  |                                      |                  |                                 |                 |                             |                  |
| Mean                                  | 0.53                                      | 0.53             | 0.53                                 | 0.51             | 0.45                            | 0.45            | 0.54                        | 0.64†            |
| (95% CI)                              | (0.51, 0.55)                              | (0.51, 0.56)     | (0.47, 0.59)                         | (0.46, 0.57)     | (0.34, 0.6)                     | (0.37, 0.56)    | (0.47, 0.62)                | (0.48, 0.86)     |
| p-value                               |                                           | 0.93             |                                      | 0.73             |                                 | 0.61            |                             | 0.22             |
| % change                              |                                           | 0.0%             |                                      | -3.8%            |                                 | 0.0%            |                             | 18.5%            |
| <b>Lead</b>                           |                                           |                  |                                      |                  |                                 |                 |                             |                  |
| Mean                                  | 0.49                                      | 0.49             | 0.43                                 | 0.40             | 0.33                            | 0.35            | 0.42                        | 0.38             |
| (95% CI)                              | (0.47, 0.51)                              | (0.47, 0.52)     | (0.38, 0.47)                         | (0.36, 0.46)     | (0.22, 0.49)                    | (0.24, 0.51)    | (0.37, 0.49)                | (0.34, 0.43)     |
| p-value                               |                                           | 0.77             |                                      | 0.22             |                                 | 0.12            |                             | 0.056            |
| % change                              |                                           | 0.0%             |                                      | -7.0%            |                                 | 6.1%            |                             | -9.5%            |
| <b>Manganese</b>                      |                                           |                  |                                      |                  |                                 |                 |                             |                  |
| Mean                                  | 0.14                                      | 0.16*            | 0.13                                 | 0.14             | 0.11                            | 0.09            | 0.13                        | 0.16*            |
| (95% CI)                              | (0.13, 0.14)                              | (0.15, 0.18)     | (0.12, 0.15)                         | (0.12, 0.17)     | (0.07, 0.18)                    | (0.07, 0.13)    | (0.11, 0.16)                | (0.14, 0.19)     |
| p-value                               |                                           | <.0001           |                                      | 0.28             |                                 | 0.77            |                             | 0.039            |
| % change                              |                                           | 14.3%            |                                      | 7.7%             |                                 | -18.2%          |                             | 23.1%            |
| <b>Strontium</b>                      |                                           |                  |                                      |                  |                                 |                 |                             |                  |
| Mean                                  | 108.38                                    | 111.94           | 125.10                               | 124.30           | 90.62                           | 98.07           | 111.10                      | 119.51           |
| (95% CI)                              | (99.81, 117.67)                           | (104.96, 119.37) | (110.33, 141.85)                     | (110.58, 139.74) | (69.54, 118.09)                 | (78.95, 121.82) | (96.58, 127.79)             | (105.55, 135.32) |
| p-value                               |                                           | 0.66             |                                      | 0.97             |                                 | 0.40            |                             | 0.31             |
| % change                              |                                           | 3.3%             |                                      | -0.6%            |                                 | 8.2%            |                             | 7.6%             |

[illegible]

|                                                                        | Exclusive Cigarette Smoking<br>(N = 1479) |                  | Dual Cigarette/ENDS Use<br>(N = 204) |                 | Exclusive ENDS Use<br>(N = 28)+ |                | No Tobacco Use<br>(N = 188) |                |
|------------------------------------------------------------------------|-------------------------------------------|------------------|--------------------------------------|-----------------|---------------------------------|----------------|-----------------------------|----------------|
| Biomarker                                                              | Wave 1                                    | Wave 2           | Wave 1                               | Wave 2          | Wave 1                          | Wave 2         | Wave 1                      | Wave 2         |
| Mean                                                                   | 1049.0                                    | 1072.3           | 1172.4                               | 1055.6*         | 996.7                           | 240.2*         | 401.5                       | 222.4*         |
| (95% CI)                                                               | (984.2, 1118.0)                           | (1011.6, 1136.6) | (1049.9, 1309.2)                     | (926.6, 1202.5) | (764.9, 1298.8)                 | (180.8, 319.1) | (303.7, 530.8)              | (188.4, 262.6) |
| p-value                                                                |                                           | 0.60             |                                      | 0.044           |                                 | <.0001         |                             | <.0001         |
| % change                                                               |                                           | 2.2%             |                                      | -10.0%          |                                 | -75.9%         |                             | -44.6%         |
| <b>1-Hydroxyphenanthrene (1-PHE)</b>                                   |                                           |                  |                                      |                 |                                 |                |                             |                |
| Mean                                                                   | 179.9                                     | 198.1*           | 190.0                                | 195.5           | 141.3                           | 93.3*          | 122.6                       | 123.7          |
| (95% CI)                                                               | (170.2, 190.3)                            | (188.3, 208.6)   | (171.3, 210.7)                       | (177.7, 215.2)  | (104.1, 191.8)                  | (79.0, 110.1)  | (106.3, 141.3)              | (104.6, 146.2) |
| p-value                                                                |                                           | <.0001           |                                      | 0.36            |                                 | 0.040          |                             | 1.00           |
| % change                                                               |                                           | 10.1%            |                                      | 2.9%            |                                 | -34.0%         |                             | 0.9%           |
| <b>1-Hydroxypyrene (1-PYR)</b>                                         |                                           |                  |                                      |                 |                                 |                |                             |                |
| Mean                                                                   | 306.0                                     | 316.8            | 323.2                                | 308.1           | 253.4                           | 113.4*         | 197.9                       | 167.9*         |
| (95% CI)                                                               | (287.4, 325.9)                            | (298.3, 336.4)   | (295.1, 354.0)                       | (277.4, 342.2)  | (188.0, 341.5)                  | (93.0, 138.4)  | (161.8, 242.1)              | (148.9, 189.4) |
| p-value                                                                |                                           | 0.36             |                                      | 0.20            |                                 | <.0001         |                             | 0.0074         |
| % change                                                               |                                           | 3.5%             |                                      | -4.7%           |                                 | -55.2%         |                             | -15.2%         |
| <b>Sum of 2-Hydroxyphenanthrene and 3-Hydroxyphenanthrene (2-3PHE)</b> |                                           |                  |                                      |                 |                                 |                |                             |                |
| Mean                                                                   | 306.1                                     | 310.4            | 326.8                                | 304.2           | 271.4                           | 132.2*         | 177.6                       | 144.3*         |
| (95% CI)                                                               | (288.6, 324.8)                            | (294.1, 327.6)   | (298.5, 357.8)                       | (277.1, 334.0)  | (213.5, 345.1)                  | (110.2, 158.5) | (147.7, 213.5)              | (127.3, 163.7) |
| p-value                                                                |                                           | 0.88             |                                      | 0.11            |                                 | <.0001         |                             | 0.0078         |
| % change                                                               |                                           | 1.4%             |                                      | -6.9%           |                                 | -51.3%         |                             | -18.7%         |
| <b>Volatile Organic Compound Metabolites (VOCM) (ug/g creatinine)</b>  |                                           |                  |                                      |                 |                                 |                |                             |                |
| <b>2-Methylhippuric acid (2MHA) (Xylene)</b>                           |                                           |                  |                                      |                 |                                 |                |                             |                |
| Mean                                                                   | 102.7                                     | 123.9            | 115.6                                | 112.6           | 95.9                            | 43.5           | 43.2                        | 27.6           |
| (95% CI)                                                               | (95.3, 110.7)                             | (116.2, 132.0)   | (98.9, 135.0)                        | (97.4, 130.1)   | (60.9, 151.1)                   | (29.6, 64)     | (32.3, 57.8)                | (23.6, 32.3)   |
| p-value                                                                |                                           | <.0001           |                                      | 0.85            |                                 | 0.0240         |                             | <.0001         |
| % change                                                               |                                           | 20.6%            |                                      | -2.6%           |                                 | -54.7%         |                             | -36.2%         |
| <b>3- &amp; 4-Methylhippuric acid (3MHA/4MHA) (Xylene)</b>             |                                           |                  |                                      |                 |                                 |                |                             |                |
| Mean                                                                   | 687.9                                     | 707.0            | 755.6                                | 704.3           | 589.6                           | 226.2*         | 306.3                       | 182.2*         |
| (95% CI)                                                               | (636.1, 743.9)                            | (657.1, 760.7)   | (662.8, 861.4)                       | (612.3, 810.2)  | (338.3, 1027.8)                 | (156.2, 327.7) | (238.3, 393.8)              | (145.5, 228.1) |
| p-value                                                                |                                           | 0.54             |                                      | 0.26            |                                 | 0.010          |                             | <.0001         |
| % change                                                               |                                           | 2.8%             |                                      | -6.8%           |                                 | -61.6%         |                             | -40.5%         |
| <b>N-Acetyl-S-(2-carbamoylethyl)-L-cysteine (2CaEMA) (Acrylamide)</b>  |                                           |                  |                                      |                 |                                 |                |                             |                |
| Mean                                                                   | 137.9                                     | 136.5*           | 142.5                                | 133.6           | 111.5                           | 57.5*          | 88.0                        | 59.1*          |
| (95% CI)                                                               | (131.2, 144.9)                            | (130.1, 143.3)   | (126.9, 160.0)                       | (120.2, 148.6)  | (81.1, 153.3)                   | (48.5, 68.3)   | (76.2, 101.7)               | (52.4, 66.6)   |
| p-value                                                                |                                           | 0.45             |                                      | 0.31            |                                 | 0.0004         |                             | <.0001         |

| Biomarker                                                                                   | Exclusive Cigarette Smoking<br>(N = 1479) |                | Dual Cigarette/ENDS Use<br>(N = 204) |                | Exclusive ENDS Use<br>(N = 28)+ |                | No Tobacco Use<br>(N = 188) |                |
|---------------------------------------------------------------------------------------------|-------------------------------------------|----------------|--------------------------------------|----------------|---------------------------------|----------------|-----------------------------|----------------|
|                                                                                             | Wave 1                                    | Wave 2         | Wave 1                               | Wave 2         | Wave 1                          | Wave 2         | Wave 1                      | Wave 2         |
| % change                                                                                    |                                           | -1.0%          |                                      | -6.2%          |                                 | -48.4%         |                             | -32.9%         |
| <b>N-Acetyl-S-(Nmethylcarbamoyl)-L-cysteine (MCaMA) (N,N-Dimethylformamide/isocyanates)</b> |                                           |                |                                      |                |                                 |                |                             |                |
| Mean                                                                                        | 494.4                                     | 506.4          | 525.9                                | 538.4*         | 326.4                           | 157.2*         | 250.6                       | 164.3*         |
| (95% CI)                                                                                    | (463.9, 526.8)                            | (479.6, 534.8) | (451.1, 613.2)                       | (472.5, 613.4) | (218.3, 488.2)                  | (117.2, 210.8) | (188.8, 332.8)              | (137.1, 197)   |
| p-value                                                                                     |                                           | 0.75           |                                      | 0.55           |                                 | <.0001         |                             | <.0001         |
| % change                                                                                    |                                           | 2.4%           |                                      | 2.4%           |                                 | -51.8%         |                             | -34.4%         |
| <b>N-Acetyl-S-(benzyl)-L-cysteine (BzMA) (Toluene)</b>                                      |                                           |                |                                      |                |                                 |                |                             |                |
| Mean                                                                                        | 6.6                                       | 6.8            | 6.2                                  | 6.3            | 6.3                             | 7.0            | 6.4                         | 5.8*           |
| (95% CI)                                                                                    | (6.2, 7.0)                                | (6.3, 7.5)     | (5.6, 6.9)                           | (5.5, 7.3)     | (4.7, 8.5)                      | (4.8, 10.1)    | (5.6, 7.3)                  | (5.2, 6.4)     |
| p-value                                                                                     |                                           | 0.54           |                                      | 0.78           |                                 | 0.44           |                             | 0.21           |
| % change                                                                                    |                                           | 4.1%           |                                      | 1.4%           |                                 | 10.8%          |                             | -9.6%          |
| <b>N-Acetyl-S-(2-carboxyethyl)-L-cysteine (2CoEMA) (Acrolein)</b>                           |                                           |                |                                      |                |                                 |                |                             |                |
| Mean                                                                                        | 284.2                                     | 284.2          | 301.1                                | 314.9          | 250.0                           | 110.4*         | 155.8                       | 98.9*          |
| (95% CI)                                                                                    | (262.0, 308.3)                            | (264.2, 305.6) | (255.7, 354.7)                       | (271.7, 364.8) | (183.3, 341.0)                  | (78.7, 154.9)  | (124.7, 194.6)              | (88.2, 110.9)  |
| p-value                                                                                     |                                           | 0.76           |                                      | 0.51           |                                 | 0.0031         |                             | 0.0001         |
| % change                                                                                    |                                           | 0.0%           |                                      | 4.6%           |                                 | -55.8%         |                             | -36.5%         |
| <b>N-Acetyl-S-(1-cyano-2-hydroxyethyl)-L-cysteine (1CyHEMA) (Acrylonitrile)</b>             |                                           |                |                                      |                |                                 |                |                             |                |
| Mean                                                                                        | 22.3                                      | 24.0           | 27.3                                 | 25.6           | 19.1                            | 2.5*           | 6.4                         | 2.9*           |
| (95% CI)                                                                                    | (20.2, 24.7)                              | (21.8, 26.4)   | (21.1, 35.2)                         | (19.9, 33)     | (12.1, 30.3)                    | (1.9, 3.4)     | (4.3, 9.7)                  | (2.4, 3.5)     |
| p-value                                                                                     |                                           | 0.04           |                                      | 0.67           |                                 | <.0001         |                             | <.0001         |
| % change                                                                                    |                                           | 7.3%           |                                      | -6.1%          |                                 | -86.9%         |                             | -54.5%         |
| <b>N-Acetyl-S-(2-cyanoethyl)-L-cysteine (2CyEMA) (Acrylonitrile)</b>                        |                                           |                |                                      |                |                                 |                |                             |                |
| Mean                                                                                        | 130.4                                     | 131.7          | 163.1                                | 128.1*         | 110.2                           | 8.6*           | 22.9                        | 3.9*           |
| (95% CI)                                                                                    | (118.6, 143.3)                            | (121.1, 143.2) | (139.4, 190.8)                       | (104.7, 156.6) | (72.8, 166.8)                   | (4.9, 14.9)    | (13.3, 39.4)                | (2.9, 5.3)     |
| p-value                                                                                     |                                           | 0.77           |                                      | 0.0071         |                                 | <.0001         |                             | <.0001         |
| % change                                                                                    |                                           | 1.0%           |                                      | -21.5%         |                                 | -92.2%         |                             | -82.9%         |
| <b>N-Acetyl-S-(3,4-dihydroxybutyl)-L-cysteine (34HBMA) (1,3 Butadiene)</b>                  |                                           |                |                                      |                |                                 |                |                             |                |
| Mean                                                                                        | 508.2                                     | 508.6*         | 490.1                                | 520.5          | 413.8                           | 376.7*         | 433.4                       | 358.2*         |
| (95% CI)                                                                                    | (487.9, 529.5)                            | (492.0, 525.8) | (446.3, 538.1)                       | (474.8, 570.6) | (336.6, 508.6)                  | (296.4, 478.8) | (378.0, 496.9)              | (326.0, 393.6) |
| p-value                                                                                     |                                           | 0.67           |                                      | 0.15           |                                 | 0.73           |                             | 0.0070         |
| % change                                                                                    |                                           | 0.1%           |                                      | 6.2%           |                                 | -9.0%          |                             | -17.4%         |
| <b>N-Acetyl-S-(2-carbamoyl-2-hydroxyethyl)-L-cysteine (2CaHEMA) (Acrylamide)</b>            |                                           |                |                                      |                |                                 |                |                             |                |
| Mean                                                                                        | 17.5                                      | 18.0           | 17.7                                 | 18.3           | 14.0                            | 8.2*           | 12.1                        | 10.2*          |
| (95% CI)                                                                                    | (16.7, 18.3)                              | (17.1, 19.0)   | (15.6, 20.1)                         | (16.2, 20.6)   | (10.0, 19.6)                    | (6.6, 10.2)    | (10.3, 14.3)                | (9.0, 11.6)    |
| p-value                                                                                     |                                           | 0.58           |                                      | 0.68           |                                 | 0.0011         |                             | 0.0011         |

|                                                                                                       | Exclusive Cigarette Smoking<br>(N = 1479) |                  | Dual Cigarette/ENDS Use<br>(N = 204) |                  | Exclusive ENDS Use<br>(N = 28)+ |                | No Tobacco Use<br>(N = 188) |                |
|-------------------------------------------------------------------------------------------------------|-------------------------------------------|------------------|--------------------------------------|------------------|---------------------------------|----------------|-----------------------------|----------------|
| Biomarker                                                                                             | Wave 1                                    | Wave 2           | Wave 1                               | Wave 2           | Wave 1                          | Wave 2         | Wave 1                      | Wave 2         |
| % change                                                                                              |                                           | 3.1%             |                                      | 3.0%             |                                 | -41.3%         |                             | -15.6%         |
| <b>N-Acetyl-S-(2-hydroxyethyl)-L-cysteine (2HEMA) (Acrylonitrile, vinyl chloride, ethylene oxide)</b> |                                           |                  |                                      |                  |                                 |                |                             |                |
| Mean                                                                                                  | 2.8                                       | 2.9              | 3.6                                  | 3.2              | 2.5                             | 0.9*†          | 1.7†                        | 0.9*†          |
| (95% CI)                                                                                              | (2.6, 3.1)                                | (2.7, 3.2)       | (2.8, 4.6)                           | (2.5, 4.1)       | (2.0, 3.1)                      | (0.7, 1.1)     | (1.3, 2.4)                  | (0.8, 1.1)     |
| p-value                                                                                               |                                           | 0.57             |                                      | 0.31             |                                 | <.0001         |                             | <.0001         |
| % change                                                                                              |                                           | 4.3%             |                                      | -10.8%           |                                 | -65.7%         |                             | -45.7%         |
| <b>N-Acetyl-S-(2-hydroxypropyl)-L-cysteine (2HPMA) (Propylene Oxide)</b>                              |                                           |                  |                                      |                  |                                 |                |                             |                |
| Mean                                                                                                  | 72.0                                      | 74.0*            | 79.9                                 | 83.5             | 60.8                            | 38.3           | 44.9                        | 31.6*          |
| (95% CI)                                                                                              | (67.4, 77.0)                              | (69.5, 78.7)     | (69.5, 91.9)                         | (70.6, 98.9)     | (46.3, 79.9)                    | (23.5, 62.3)   | (37.0, 54.6)                | (26.5, 37.7)   |
| p-value                                                                                               |                                           | 0.62             |                                      | 0.45             |                                 | 0.17           |                             | 0.0082         |
| % change                                                                                              |                                           | 2.7%             |                                      | 4.5%             |                                 | -37.1%         |                             | -29.6%         |
| <b>N-Acetyl-S-(3-hydroxypropyl)-L-cysteine (3HPMA) (Acrolein)</b>                                     |                                           |                  |                                      |                  |                                 |                |                             |                |
| Mean                                                                                                  | 1162.5                                    | 1342.2*          | 1410.3                               | 1531.6           | 1074.8                          | 303.8*         | 544.2                       | 299.9*         |
| (95% CI)                                                                                              | (1061.0, 1273.8)                          | (1247.8, 1443.7) | (1240.3, 1603.6)                     | (1321.6, 1774.9) | (770.3, 1499.5)                 | (228.7, 403.7) | (390.9, 757.7)              | (255.8, 351.5) |
| p-value                                                                                               |                                           | <.0001           |                                      | 0.26             |                                 | <.0001         |                             | 0.0010         |
| % change                                                                                              |                                           | 15.5%            |                                      | 8.6%             |                                 | -71.7%         |                             | -44.9%         |
| <b>N-Acetyl-S-(3-hydroxypropyl-1-methyl)-L-cysteine (3HMPMA) (Crotonaldehyde)</b>                     |                                           |                  |                                      |                  |                                 |                |                             |                |
| Mean                                                                                                  | 1353.1                                    | 1418.6           | 1580.6                               | 1530.1           | 1186.2                          | 245.3          | 559.8                       | 260.4          |
| (95% CI)                                                                                              | (1231.8, 1486.3)                          | (1315.9, 1529.3) | (1357.8, 184.0)                      | (1340.2, 1746.9) | (771.2, 1824.4)                 | (188.0, 320.1) | (408.7, 766.8)              | (228.0, 297.4) |
| p-value                                                                                               |                                           | 0.31             |                                      | 0.69             |                                 | <.0001         |                             | <.0001         |
| % change                                                                                              |                                           | 4.8%             |                                      | -3.2%            |                                 | -79.3%         |                             | -53.5%         |
| <b>N-Acetyl-S-(4-hydroxy-2-methyl-2-buten-1-yl)-L-cysteine (4HMBema) (Isoprene)</b>                   |                                           |                  |                                      |                  |                                 |                |                             |                |
| Mean                                                                                                  | 34.9                                      | 37.8*            | 42.4                                 | 39.1*            | 28.0                            | 4.7            | 10.5                        | 5.8            |
| (95% CI)                                                                                              | (31.7, 38.5)                              | (34.3, 41.5)     | (35.8, 50.3)                         | (31.1, 49.2)     | (18.0, 43.5)                    | (2.9, 7.6)     | (6.2, 18.0)                 | (4.8, 6.9)     |
| p-value                                                                                               |                                           | 0.07             |                                      | 0.53             |                                 | <.0001         |                             | 0.0027         |
| % change                                                                                              |                                           | 8.1%             |                                      | -7.8%            |                                 | -83.3%         |                             | -45.1%         |
| <b>Mandelic acid (MADA)</b>                                                                           |                                           |                  |                                      |                  |                                 |                |                             |                |
| Mean                                                                                                  | 284.4                                     | 306.3*           | 305.1                                | 293.7            | 214.4                           | 132.1          | 178.0                       | 160.4*         |
| (95% CI)                                                                                              | (271.6, 297.9)                            | (294.1, 319.0)   | (272.8, 341.2)                       | (256.5, 336.3)   | (123.9, 371.0)                  | (103.8, 168.2) | (156.0, 203.1)              | (148.7, 172.9) |
| p-value                                                                                               |                                           | 0.03             |                                      | 0.66             |                                 | 0.08           |                             | 0.04           |
| % change                                                                                              |                                           | 7.7%             |                                      | -3.7%            |                                 | -38.4%         |                             | -9.9%          |
| <b>N-Acetyl-S-(4-hydroxy-2-buten-1-yl)-L-cysteine (4HBeMA) (1,3 Butadiene)</b>                        |                                           |                  |                                      |                  |                                 |                |                             |                |
| Mean                                                                                                  | 28.5                                      | 31.8*            | 32.3                                 | 33.9             | 22.8                            | 5.1*           | 11.8                        | 5.4*           |
| (95% CI)                                                                                              | (26.2, 31.0)                              | (29.6, 34.2)     | (27.8, 37.6)                         | (28.9, 39.8)     | (15.7, 33.1)                    | (3.9, 6.8)     | (7.9, 17.5)                 | (4.6, 6.4)     |
| p-value                                                                                               |                                           | 0.0011           |                                      | 0.52             |                                 | <.0001         |                             | 0.0001         |

| Biomarker                                                               | Exclusive Cigarette Smoking<br>(N = 1479) |                   | Dual Cigarette/ENDS Use<br>(N = 204) |                   | Exclusive ENDS Use<br>(N = 28) <sup>†</sup> |                  | No Tobacco Use<br>(N = 188) |                  |
|-------------------------------------------------------------------------|-------------------------------------------|-------------------|--------------------------------------|-------------------|---------------------------------------------|------------------|-----------------------------|------------------|
|                                                                         | Wave 1                                    | Wave 2            | Wave 1                               | Wave 2            | Wave 1                                      | Wave 2           | Wave 1                      | Wave 2           |
| % change                                                                |                                           | 11.7%             |                                      | 4.8%              |                                             | -77.4%           |                             | -53.7%           |
| <b>Phenylglyoxylic acid (PhGA) (Ethylbenzene, styrene)</b>              |                                           |                   |                                      |                   |                                             |                  |                             |                  |
| Mean                                                                    | 380.9                                     | 404.5*            | 373.9                                | 398.5             | 331.0                                       | 216.7*           | 258.3                       | 224.2*           |
| (95% CI)                                                                | (363.8, 398.9)                            | (387.4, 422.4)    | (344.8, 405.5)                       | (360.3, 440.7)    | (232.2, 471.9)                              | (173.4, 270.8)   | (221.8, 300.9)              | (197.6, 254.3)   |
| p-value                                                                 |                                           | 0.03              |                                      | 0.12              |                                             | 0.02             |                             | 0.03             |
| % change                                                                |                                           | 6.2%              |                                      | 6.6%              |                                             | -34.5%           |                             | -13.2%           |
| <b>N-Acetyl-S-(phenyl)-L-cysteine (PhMA) (Benzene)</b>                  |                                           |                   |                                      |                   |                                             |                  |                             |                  |
| Mean                                                                    | 1.1 <sup>†</sup>                          | 1.0* <sup>†</sup> | 1.1 <sup>†</sup>                     | 0.9* <sup>†</sup> | 1.0 <sup>†</sup>                            | 0.8 <sup>†</sup> | 1.0 <sup>†</sup>            | 0.9 <sup>†</sup> |
| (95% CI)                                                                | (1.0, 1.2)                                | (0.9, 1.0)        | (1.0, 1.3)                           | (0.8, 1.0)        | (0.7, 1.3)                                  | (0.6, 1.0)       | (0.8, 1.1)                  | (0.8, 1.0)       |
| p-value                                                                 |                                           | 0.0002            |                                      | 0.0059            |                                             | 0.28             |                             | 0.31             |
| % change                                                                |                                           | -10.9%            |                                      | -18.2%            |                                             | -21.9%           |                             | -7.3%            |
| <b>2-Thioxothiazolidine-4-carboxylic acid (TTCA) (Carbon Disulfide)</b> |                                           |                   |                                      |                   |                                             |                  |                             |                  |
| Mean                                                                    | 21.3                                      | 17.0*             | 22.2                                 | 19.5              | 18.5                                        | 18.0             | 22.1                        | 14.4*            |
| (95% CI)                                                                | (19.7, 22.9)                              | (15.5, 18.7)      | (18.3, 26.8)                         | (15.1, 25.1)      | (11.5, 29.8)                                | (10.1, 32.0)     | (16.2, 30.1)                | (11.3, 18.4)     |
| p-value                                                                 |                                           | <.0001            |                                      | 0.44              |                                             | 0.91             |                             | 0.0025           |
| % change                                                                |                                           | -20.0%            |                                      | -12.2%            |                                             | -2.8%            |                             | -34.7%           |

Abbreviations: : PATH – Population Assessment of Tobacco and Health, ENDS – electronic nicotine delivery system, CI – confidence interval. All estimates are weighted.

All geometric means are creatinine adjusted. P-values are for the Wave 1 to Wave 2 change in biomarker levels. % change indicates the Wave 1 to Wave 2 change in geometric mean by Wave 2 tobacco product use group.

\* Indicates a statistically significant change ( $p < 0.05$ ) in biomarker levels from Wave 1 to Wave 2.

<sup>†</sup> Estimate should be interpreted with caution because it has low statistical precision. The coefficient of variation of the estimate is larger than 30% or it is based on a denominator sample size of less than 50.

§Concentrations of 1-NAP and 2-NAP are ug/g, all other polycyclic aromatic hydrocarbon biomarker concentrations are in ng/g.



**Table S2. Geometric mean biomarker concentrations and 95% CIs by Wave 2 tobacco use status, among Wave 1 dual cigarette/ENDS users, PATH Study (2013-2015).**

|                                                | Exclusive Cigarette Smoking<br>(N = 273) |                  | Dual Cigarette/ENDS Use<br>(N = 242) |                  | Exclusive ENDS Use<br>(N = 30) <sup>†</sup> |                  | No Tobacco Use<br>(N = 31) <sup>†</sup> |                   |
|------------------------------------------------|------------------------------------------|------------------|--------------------------------------|------------------|---------------------------------------------|------------------|-----------------------------------------|-------------------|
| Biomarker                                      | Wave 1                                   | Wave 2           | Wave 1                               | Wave 2           | Wave 1                                      | Wave 2           | Wave 1                                  | Wave 2            |
| Urinary Nicotine Metabolites (ug/g creatinine) |                                          |                  |                                      |                  |                                             |                  |                                         |                   |
| Nicotine Equivalence (TNE2) (umol/g)           |                                          |                  |                                      |                  |                                             |                  |                                         |                   |
| Mean                                           | 43.3                                     | 42.1             | 41.5                                 | 44.8             | 48.4                                        | 27.6             | 2.9 <sup>†</sup>                        | 0.0*              |
| (95% CI)                                       | (36.9, 50.9)                             | (35.7, 49.7)     | (35.2, 49.1)                         | (39.3, 51.2)     | (32.7, 71.7)                                | (12.1, 62.6)     | (0.7, 12.6)                             | (0.0, 0.1)        |
| p-value                                        |                                          | 0.92             |                                      | 0.27             |                                             | 0.079            |                                         | <.0001            |
| % change                                       |                                          | -2.7%            |                                      | 7.9%             |                                             | -43.1%           |                                         | -98.6%            |
| trans-3'-Hydroxycotinine (HCTT)                |                                          |                  |                                      |                  |                                             |                  |                                         |                   |
| Mean                                           | 4783.2                                   | 4744.7           | 4550.2                               | 4875.5           | 4854.5                                      | 2808.9           | 346.2                                   | 4.8*              |
| (95% CI)                                       | (4038.4, 5665.5)                         | (4020.1, 5599.8) | (3808.9, 5435.8)                     | (4241.6, 5604.1) | (3202, 7359.8)                              | (1197.6, 6588.3) | (79.9, 1499.5)                          | (1.9, 12.1)       |
| p-value                                        |                                          | 0.78             |                                      | 0.36             |                                             | 0.095            |                                         | <.0001            |
| % change                                       |                                          | -0.8%            |                                      | 7.1%             |                                             | -42.1%           |                                         | -98.6%            |
| Cotinine (COTT)                                |                                          |                  |                                      |                  |                                             |                  |                                         |                   |
| Mean                                           | 2788.8                                   | 2683.9           | 2786.0                               | 3030.9           | 3718.1                                      | 2072.4           | 171.4                                   | 2.1* <sup>†</sup> |
| (95% CI)                                       | (2306.4, 3372.0)                         | (2218.9, 3246.3) | (2352.9, 3299.0)                     | (2639.2, 3480.7) | (2456.0, 5628.6)                            | (910.4, 4717.6)  | (38.4, 765.4)                           | (0.8, 5.3)        |
| p-value                                        |                                          | 0.96             |                                      | 0.22             |                                             | 0.067            |                                         | <.0001            |
| % change                                       |                                          | -3.8%            |                                      | 8.8%             |                                             | -44.3%           |                                         | -98.8%            |
| Nicotine (NICT)                                |                                          |                  |                                      |                  |                                             |                  |                                         |                   |
| Mean                                           | 1488.1                                   | 1194.1*          | 1296.5                               | 1437.8           | 1557.0                                      | 1415.4           | 150.0                                   | 46.7              |
| (95% CI)                                       | (1175.4, 1884.0)                         | (955.9, 1491.6)  | (1047.4, 1604.9)                     | (1175.1, 1759.3) | (1121.7, 2161.2)                            | (724.7, 2764.4)  | (18.8, 1197.6)                          | (6.6, 329.3)      |
| p-value                                        |                                          | 0.038            |                                      | 0.19             |                                             | 0.60             |                                         | 0.23              |
| % change                                       |                                          | -19.8%           |                                      | 10.9%            |                                             | -9.1%            |                                         | -68.9%            |
| Cotinine N-oxide (COXT)                        |                                          |                  |                                      |                  |                                             |                  |                                         |                   |
| Mean                                           | 344.2                                    | 346.6            | 355.2                                | 379.3            | 458.5                                       | 310.5            | 97.0                                    | 31.6              |
| (95% CI)                                       | (307.1, 385.8)                           | (309.3, 388.3)   | (316.0, 399.3)                       | (333.5, 431.4)   | (367.3, 572.3)                              | (166.1, 580.4)   | (20.4, 461.5)                           | (4.9, 205.1)      |
| p-value                                        |                                          | 0.49             |                                      | 0.15             |                                             | 0.13             |                                         | 0.21              |
| % change                                       |                                          | 0.7%             |                                      | 6.8%             |                                             | -32.3%           |                                         | -67.4%            |
| Nicotine 1'-oxide (NOXT)                       |                                          |                  |                                      |                  |                                             |                  |                                         |                   |
| Mean                                           | 399.6                                    | 336.8*           | 390.0                                | 399.2            | 607.5                                       | 433.3            | 59.2                                    | 18.1 <sup>†</sup> |
| (95% CI)                                       | (337.2, 473.7)                           | (287.9, 393.9)   | (326.7, 465.5)                       | (333.1, 478.4)   | (450.3, 819.6)                              | (209.7, 895.5)   | (5.3, 665.3)                            | (2.2, 152.5)      |
| p-value                                        |                                          | 0.034            |                                      | 0.64             |                                             | 0.23             |                                         | 0.33              |
| % change                                       |                                          | -15.7%           |                                      | 2.4%             |                                             | -28.7%           |                                         | -69.4%            |
| Nornicotine (NNCT)                             |                                          |                  |                                      |                  |                                             |                  |                                         |                   |

|                                                                | Exclusive Cigarette Smoking<br>(N = 273) |                | Dual Cigarette/ENDS Use<br>(N = 242) |                | Exclusive ENDS Use<br>(N = 30)† |              | No Tobacco Use<br>(N = 31)† |             |
|----------------------------------------------------------------|------------------------------------------|----------------|--------------------------------------|----------------|---------------------------------|--------------|-----------------------------|-------------|
| Biomarker                                                      | Wave 1                                   | Wave 2         | Wave 1                               | Wave 2         | Wave 1                          | Wave 2       | Wave 1                      | Wave 2      |
| Mean                                                           | 71.2                                     | 66.7           | 69.0                                 | 73.3           | 69.8                            | 47.5         | 14.5                        | 6.5†        |
| (95% CI)                                                       | (60.5, 83.8)                             | (56.9, 78.1)   | (60.0, 79.4)                         | (64.4, 83.5)   | (57.1, 85.3)                    | (30.1, 74.8) | (3.5, 61.0)                 | (1.2, 35.2) |
| p-value                                                        |                                          | 0.60           |                                      | 0.19           |                                 | 0.094        |                             | 0.21        |
| % change                                                       |                                          | -6.4%          |                                      | 6.2%           |                                 | -32.0%       |                             | -55.0%      |
| <b>Minor Tobacco Alkaloids (ug/g creatinine)</b>               |                                          |                |                                      |                |                                 |              |                             |             |
| <b>Anabasine (ANBT)</b>                                        |                                          |                |                                      |                |                                 |              |                             |             |
| Mean                                                           | 9.5                                      | 8.4            | 8.3                                  | 8.6            | 4.8                             | 1.4*†        | 2.1†                        | 1.1†        |
| (95% CI)                                                       | (8.0, 11.2)                              | (7.1, 10.0)    | (7.2, 9.6)                           | (7.4, 9.9)     | (2.6, 8.8)                      | (0.8, 2.3)   | (0.6, 7.3)                  | (0.3, 4.6)  |
| p-value                                                        |                                          | 0.19           |                                      | 0.68           |                                 | 0.0024       |                             | 0.25        |
| % change                                                       |                                          | -11.1%         |                                      | 3.2%           |                                 | -71.1%       |                             | -48.3%      |
| <b>Anatabine (ANTT)</b>                                        |                                          |                |                                      |                |                                 |              |                             |             |
| Mean                                                           | 17.0                                     | 14.5           | 13.7                                 | 13.7           | 7.2                             | 1.2*†        | 3.1†                        | 1.1†        |
| (95% CI)                                                       | (14.0, 20.7)                             | (12.0, 17.5)   | (11.5, 16.4)                         | (11.4, 16.4)   | (3.3, 15.9)                     | (0.7, 2.2)   | (0.6, 17)                   | (0.2, 6.7)  |
| p-value                                                        |                                          | 0.080          |                                      | 0.83           |                                 | 0.0006       |                             | 0.19        |
| % change                                                       |                                          | -14.8%         |                                      | -0.7%          |                                 | -83.1%       |                             | -64.0%      |
| <b>Tobacco Specific Nitrosamines (TSNAs) (ng/g creatinine)</b> |                                          |                |                                      |                |                                 |              |                             |             |
| <b>4-methylnitrosamino)-4-(3-pyridyl)-1-butanol (NNAL)</b>     |                                          |                |                                      |                |                                 |              |                             |             |
| Mean                                                           | 281.0                                    | 277.6          | 258.3                                | 241.7          | 151.0                           | 7.0*         | 40.2                        | 3.8*        |
| (95% CI)                                                       | (234.2, 337.2)                           | (231.1, 333.4) | (222.6, 299.7)                       | (208.0, 280.9) | (87.4, 260.8)                   | (3.7, 13.1)  | (16.5, 97.9)                | (2.2, 6.7)  |
| p-value                                                        |                                          | 0.56           |                                      | 0.25           |                                 | <.0001       |                             | <.0001      |
| % change                                                       |                                          | -1.2%          |                                      | -6.4%          |                                 | -95.4%       |                             | -90.5%      |
| <b>N'-Nitrosonornicotine (NNN)</b>                             |                                          |                |                                      |                |                                 |              |                             |             |
| Mean                                                           | 13.2                                     | 12.1           | 13.0                                 | 13.0           | 9.5                             | 7.1          | 6.4                         | 2.5*        |
| (95% CI)                                                       | (10.9, 15.9)                             | (10.5, 14.0)   | (10.9, 15.5)                         | (11.3, 15.0)   | (6.7, 13.6)                     | (4.1, 12.3)  | (3.4, 12.1)                 | (1.9, 3.4)  |
| p-value                                                        |                                          | 0.64           |                                      | 0.68           |                                 | 0.052        |                             | 0.0005      |
| % change                                                       |                                          | -8.3%          |                                      | 0.0%           |                                 | -25.1%       |                             | -60.5%      |
| <b>N'-nitrosoanatabine (NAT)</b>                               |                                          |                |                                      |                |                                 |              |                             |             |
| Mean                                                           | 151.2                                    | 132.4          | 131.4                                | 118.3          | 69.3                            | 5.4*         | 28.3                        | 4.2*        |
| (95% CI)                                                       | (123.0, 185.8)                           | (109.2, 160.5) | (109.0, 158.4)                       | (97.9, 142.9)  | (31.1, 154.6)                   | (3.7, 7.9)   | (11.9, 67.4)                | (3.0, 5.9)  |
| p-value                                                        |                                          | 0.31           |                                      | 0.16           |                                 | <.0001       |                             | <.0001      |
| % change                                                       |                                          | -12.4%         |                                      | -10.0%         |                                 | -92.2%       |                             | -85.2%      |
| <b>N'-nitrosoanabasine (NAB)</b>                               |                                          |                |                                      |                |                                 |              |                             |             |
| Mean                                                           | 23.6                                     | 19.6*          | 22.1                                 | 19.1*          | 13.2                            | 1.8*†        | 5.8                         | 1.4*†       |

|                                       | Exclusive Cigarette Smoking<br>(N = 273) |                 | Dual Cigarette/ENDS Use<br>(N = 242) |                  | Exclusive ENDS Use<br>(N = 30)† |                 | No Tobacco Use<br>(N = 31)† |                 |
|---------------------------------------|------------------------------------------|-----------------|--------------------------------------|------------------|---------------------------------|-----------------|-----------------------------|-----------------|
| Biomarker                             | Wave 1                                   | Wave 2          | Wave 1                               | Wave 2           | Wave 1                          | Wave 2          | Wave 1                      | Wave 2          |
| (95% CI)                              | (19.6, 28.5)                             | (16.5, 23.4)    | (19.0, 25.7)                         | (16.5, 22.1)     | (7.1, 24.5)                     | (1.2, 2.7)      | (2.9, 11.6)                 | (1.1, 1.9)      |
| p-value                               |                                          | 0.020           |                                      | 0.030            |                                 | <.0001          |                             | <.0001          |
| % change                              |                                          | -17.0%          |                                      | -13.5%           |                                 | -86.5%          |                             | -75.1%          |
| <b>Heavy Metals (ug/g creatinine)</b> |                                          |                 |                                      |                  |                                 |                 |                             |                 |
| <b>Beryllium</b>                      |                                          |                 |                                      |                  |                                 |                 |                             |                 |
| Mean                                  | 0.01                                     | 0.01            | 0.01                                 | 0.01             | 0.01                            | 0.02            | 0.01                        | 0.01            |
| (95% CI)                              | (0.01, 0.02)                             | (0.01, 0.01)    | (0.01, 0.01)                         | (0.01, 0.01)     | (0.01, 0.02)                    | (0.01, 0.03)    | (0.01, 0.02)                | (0.01, 0.02)    |
| p-value                               |                                          | 0.80            |                                      | 0.57             |                                 | 0.36            |                             | 0.32            |
| % change                              |                                          | 0.0%            |                                      | 0.0%             |                                 | 100.0%          |                             | 0.0%            |
| <b>Cadmium</b>                        |                                          |                 |                                      |                  |                                 |                 |                             |                 |
| Mean                                  | 0.28                                     | 0.31*           | 0.28                                 | 0.31             | 0.29                            | 0.35            | 0.16                        | 0.16            |
| (95% CI)                              | (0.25, 0.32)                             | (0.28, 0.35)    | (0.24, 0.32)                         | (0.27, 0.35)     | (0.20, 0.44)                    | (0.26, 0.48)    | (0.11, 0.22)                | (0.11, 0.21)    |
| p-value                               |                                          | 0.0088          |                                      | 0.10             |                                 | 0.55            |                             | 0.87            |
| % change                              |                                          | 10.7%           |                                      | 10.7%            |                                 | 20.7%           |                             | 0.0%            |
| <b>Cobalt</b>                         |                                          |                 |                                      |                  |                                 |                 |                             |                 |
| Mean                                  | 0.57                                     | 0.56            | 0.60                                 | 0.60             | 0.82†                           | 0.55*           | 0.57                        | 0.48*           |
| (95% CI)                              | (0.52, 0.62)                             | (0.50, 0.61)    | (0.55, 0.66)                         | (0.54, 0.67)     | (0.58, 1.15)                    | (0.43, 0.7)     | (0.49, 0.66)                | (0.42, 0.56)    |
| p-value                               |                                          | 0.96            |                                      | 0.82             |                                 | 0.0007          |                             | 0.024           |
| % change                              |                                          | -1.8%           |                                      | 0.0%             |                                 | -32.9%          |                             | -15.8%          |
| <b>Lead</b>                           |                                          |                 |                                      |                  |                                 |                 |                             |                 |
| Mean                                  | 0.50                                     | 0.46            | 0.49                                 | 0.50             | 0.61                            | 0.46*           | 0.49                        | 0.44            |
| (95% CI)                              | (0.45, 0.55)                             | (0.42, 0.51)    | (0.44, 0.53)                         | (0.45, 0.55)     | (0.48, 0.77)                    | (0.35, 0.61)    | (0.37, 0.64)                | (0.32, 0.60)    |
| p-value                               |                                          | 0.22            |                                      | 0.43             |                                 | 0.0023          |                             | 0.20            |
| % change                              |                                          | -8.0%           |                                      | 2.0%             |                                 | -24.6%          |                             | -10.2%          |
| <b>Manganese</b>                      |                                          |                 |                                      |                  |                                 |                 |                             |                 |
| Mean                                  | 0.15                                     | 0.18            | 0.17                                 | 0.17             | 0.18                            | 0.36†           | 0.13                        | 0.11*           |
| (95% CI)                              | (0.13, 0.16)                             | (0.13, 0.26)    | (0.14, 0.20)                         | (0.15, 0.20)     | (0.13, 0.25)                    | (0.17, 0.78)    | (0.10, 0.19)                | (0.09, 0.14)    |
| p-value                               |                                          | 0.13            |                                      | 0.99             |                                 | 0.065           |                             | 0.0031          |
| % change                              |                                          | 20.0%           |                                      | 0.0%             |                                 | 100.0%          |                             | -15.4%          |
| <b>Strontium</b>                      |                                          |                 |                                      |                  |                                 |                 |                             |                 |
| Mean                                  | 128.07                                   | 110.11          | 134.46                               | 127.96           | 142.52                          | 134.81          | 172.97                      | 133.10          |
| (95% CI)                              | (115.18, 142.40)                         | (93.69, 129.41) | (122.45, 147.64)                     | (117.16, 139.75) | (94.26, 215.49)                 | (94.33, 192.66) | (137.34, 217.85)            | (89.98, 196.88) |
| p-value                               |                                          | 0.14            |                                      | 0.25             |                                 | 0.42            |                             | 0.051           |
| % change                              |                                          | -14.0%          |                                      | -4.8%            |                                 | -5.4%           |                             | -23.1%          |

[illegible]

|                                                                        | Exclusive Cigarette Smoking<br>(N = 273) |                  | Dual Cigarette/ENDS Use<br>(N = 242) |                  | Exclusive ENDS Use<br>(N = 30)† |                | No Tobacco Use<br>(N = 31)† |                |
|------------------------------------------------------------------------|------------------------------------------|------------------|--------------------------------------|------------------|---------------------------------|----------------|-----------------------------|----------------|
| Biomarker                                                              | Wave 1                                   | Wave 2           | Wave 1                               | Wave 2           | Wave 1                          | Wave 2         | Wave 1                      | Wave 2         |
| Mean                                                                   | 1208.0                                   | 1163.1           | 1098.0                               | 1111.8           | 915.6                           | 229.1*         | 470.2                       | 211.3*         |
| (95% CI)                                                               | (1096.1, 1331.4)                         | (1053.4, 1284.2) | (1001.7, 1203.6)                     | (1003.4, 1231.8) | (644.7, 1300.4)                 | (145.9, 359.8) | (292.1, 756.8)              | (157.1, 284.2) |
| p-value                                                                |                                          | 0.60             |                                      | 0.82             |                                 | <.0001         |                             | 0.0015         |
| % change                                                               |                                          | -3.7%            |                                      | 1.3%             |                                 | -75.0%         |                             | -55.1%         |
| <b>1-Hydroxyphenanthrene (1-PHE)</b>                                   |                                          |                  |                                      |                  |                                 |                |                             |                |
| Mean                                                                   | 203.0                                    | 214.5*           | 193.6                                | 211.6*           | 180.6                           | 154.5          | 173.7                       | 138.9          |
| (95% CI)                                                               | (189.1, 217.9)                           | (198.3, 231.9)   | (180.1, 208.1)                       | (195.5, 229.0)   | (135.4, 240.8)                  | (101.5, 235.3) | (126.3, 238.8)              | (117.2, 164.7) |
| p-value                                                                |                                          | 0.012            |                                      | 0.012            |                                 | 0.21           |                             | 0.19           |
| % change                                                               |                                          | 5.6%             |                                      | 9.3%             |                                 | -14.4%         |                             | -20.0%         |
| <b>1-Hydroxypyrene (1-PYR)</b>                                         |                                          |                  |                                      |                  |                                 |                |                             |                |
| Mean                                                                   | 371.8                                    | 352.6            | 338.1                                | 342.5            | 295.1                           | 151.7*         | 211.3                       | 139.7*         |
| (95% CI)                                                               | (341.5, 404.9)                           | (319.7, 388.9)   | (311.6, 366.7)                       | (309.3, 379.2)   | (234.0, 372.2)                  | (102.4, 224.8) | (143.1, 312.2)              | (115.8, 168.5) |
| p-value                                                                |                                          | 0.27             |                                      | 0.86             |                                 | 0.0001         |                             | 0.013          |
| % change                                                               |                                          | -5.2%            |                                      | 1.3%             |                                 | -48.6%         |                             | -33.9%         |
| <b>Sum of 2-Hydroxyphenanthrene and 3-Hydroxyphenanthrene (2-3PHE)</b> |                                          |                  |                                      |                  |                                 |                |                             |                |
| Mean                                                                   | 325.0                                    | 317.3            | 293.6                                | 309.6            | 290.3                           | 169.1*         | 205.4                       | 134.6*         |
| (95% CI)                                                               | (297.9, 354.6)                           | (288.6, 348.7)   | (272.9, 315.8)                       | (281.8, 340.2)   | (222.2, 379.1)                  | (110.4, 259.0) | (137.2, 307.4)              | (109.5, 165.4) |
| p-value                                                                |                                          | 0.82             |                                      | 0.21             |                                 | 0.0010         |                             | 0.041          |
| % change                                                               |                                          | -2.4%            |                                      | 5.4%             |                                 | -41.7%         |                             | -34.5%         |
| <b>Volatile Organic Compound Metabolites (VOCM) (ug/g creatinine)</b>  |                                          |                  |                                      |                  |                                 |                |                             |                |
| <b>3- &amp; 4-Methylhippuric acid (3MHA/4MHA) (Xylene)</b>             |                                          |                  |                                      |                  |                                 |                |                             |                |
| Mean                                                                   | 122.3                                    | 119.9            | 109.5                                | 131.9            | 94.8                            | 32.9           | 53.0                        | 33.4           |
| (95% CI)                                                               | (108.3, 138.2)                           | (107.1, 134.3)   | (97.1, 123.5)                        | (114.8, 151.5)   | (59.5, 150.9)                   | (23.3, 46.6)   | (33.1, 84.7)                | (24.2, 45.9)   |
| p-value                                                                |                                          | 0.86             |                                      | 0.0008           |                                 | 0.0003         |                             | 0.033          |
| % change                                                               |                                          | -2.0%            |                                      | 20.4%            |                                 | -65.2%         |                             | -37.0%         |
| <b>3, 4-Methylhippuric acid (34MH) (Xylene)</b>                        |                                          |                  |                                      |                  |                                 |                |                             |                |
| Mean                                                                   | 826.2                                    | 743.1            | 716.5                                | 755.0            | 645.5                           | 141.8*         | 358.3                       | 210.4*         |
| (95% CI)                                                               | (733.8, 930.3)                           | (674.9, 818.2)   | (641.7, 799.9)                       | (669.4, 851.5)   | (482.2, 864.3)                  | (95.1, 211.3)  | (231.1, 555.5)              | (147.1, 301.0) |
| p-value                                                                |                                          | 0.10             |                                      | 0.28             |                                 | <.0001         |                             | 0.021          |
| % change                                                               |                                          | -10.1%           |                                      | 5.4%             |                                 | -78.0%         |                             | -41.3%         |
| <b>N-Acetyl-S-(2-carbamoylethyl)-L-cysteine (CaEMA) (Acrylamide)</b>   |                                          |                  |                                      |                  |                                 |                |                             |                |
| Mean                                                                   | 149.9                                    | 135.4            | 143.2                                | 136.2            | 113.0                           | 40.0*          | 84.1                        | 53.8*          |
| (95% CI)                                                               | (137.1, 163.9)                           | (125.8, 145.8)   | (132.9, 154.4)                       | (127.0, 146.1)   | (80.3, 159.1)                   | (31.6, 50.7)   | (62.3, 113.6)               | (39.8, 72.8)   |
| p-value                                                                |                                          | 0.028            |                                      | 0.17             |                                 | <.0001         |                             | 0.0019         |

| Biomarker                                                                                   | Exclusive Cigarette Smoking<br>(N = 273) |                | Dual Cigarette/ENDS Use<br>(N = 242) |                | Exclusive ENDS Use<br>(N = 30) <sup>†</sup> |                | No Tobacco Use<br>(N = 31) <sup>†</sup> |                |
|---------------------------------------------------------------------------------------------|------------------------------------------|----------------|--------------------------------------|----------------|---------------------------------------------|----------------|-----------------------------------------|----------------|
|                                                                                             | Wave 1                                   | Wave 2         | Wave 1                               | Wave 2         | Wave 1                                      | Wave 2         | Wave 1                                  | Wave 2         |
| % change                                                                                    |                                          | -9.7%          |                                      | -4.9%          |                                             | -64.6%         |                                         | -36.0%         |
| <b>N-Acetyl-S-(Nmethylcarbamoyl)-L-cysteine (MCaMA) (N,N-Dimethylformamide/isocyanates)</b> |                                          |                |                                      |                |                                             |                |                                         |                |
| Mean                                                                                        | 568.7                                    | 569.4          | 545.5                                | 555.7          | 381.9                                       | 195.0*         | 274.8                                   | 173.9*         |
| (95% CI)                                                                                    | (515.7, 627.1)                           | (516.8, 627.4) | (493.0, 603.6)                       | (505.7, 610.8) | (274.3, 531.8)                              | (137.2, 277.2) | (181.6, 416.0)                          | (140.3, 215.6) |
| p-value                                                                                     |                                          | 0.31           |                                      | 0.65           |                                             | 0.0012         |                                         | 0.013          |
| % change                                                                                    |                                          | 0.1%           |                                      | 1.9%           |                                             | -48.9%         |                                         | -36.7%         |
| <b>N-Acetyl-S-(benzyl)-L-cysteine (BzMA) (Toluene)</b>                                      |                                          |                |                                      |                |                                             |                |                                         |                |
| Mean                                                                                        | 6.9                                      | 6.2            | 6.8                                  | 6.7            | 4.7                                         | 6.0*           | 7.7                                     | 7.9            |
| (95% CI)                                                                                    | (6.1, 7.8)                               | (5.5, 7.1)     | (5.9, 7.8)                           | (5.9, 7.6)     | (3.5, 6.2)                                  | (4.7, 7.7)     | (5.9, 10.1)                             | (5.7, 10.9)    |
| p-value                                                                                     |                                          | 0.13           |                                      | 0.85           |                                             | 0.14           |                                         | 0.92           |
| % change                                                                                    |                                          | -9.6%          |                                      | -1.0%          |                                             | 29.7%          |                                         | 2.5%           |
| <b>N-Acetyl-S-(2-carboxyethyl)-L-cysteine (2CoEMA) (Acrolein)</b>                           |                                          |                |                                      |                |                                             |                |                                         |                |
| Mean                                                                                        | 326.8                                    | 301.4          | 299.6                                | 303.8          | 245.2                                       | 104.8*         | 152.6                                   | 97.8           |
| (95% CI)                                                                                    | (293.4, 364.0)                           | (271.0, 335.2) | (275.4, 325.9)                       | (278.5, 331.4) | (171.7, 350.3)                              | (71.1, 154.5)  | (110.0, 211.7)                          | (74.6, 128.3)  |
| p-value                                                                                     |                                          | 0.16           |                                      | 0.81           |                                             | 0.0003         |                                         | 0.0025         |
| % change                                                                                    |                                          | -7.8%          |                                      | 1.4%           |                                             | -57.3%         |                                         | -35.9%         |
| <b>N-Acetyl-S-(1-cyano-2-hydroxyethyl)-L-cysteine (1CyHEMA) (Acrylonitrile)</b>             |                                          |                |                                      |                |                                             |                |                                         |                |
| Mean                                                                                        | 28.9                                     | 27.3           | 26.4                                 | 27.6           | 17.2                                        | 3.2*           | 9.0                                     | 3.2*           |
| (95% CI)                                                                                    | (23.9, 35.0)                             | (22.8, 32.6)   | (22.9, 30.3)                         | (24.1, 31.7)   | (10.0, 29.8)                                | (2.2, 4.8)     | (4.8, 16.7)                             | (2.2, 4.6)     |
| p-value                                                                                     |                                          | 0.58           |                                      | 0.48           |                                             | <.0001         |                                         | 0.0019         |
| % change                                                                                    |                                          | -5.7%          |                                      | 4.8%           |                                             | -81.3%         |                                         | -64.8%         |
| <b>N-Acetyl-S-(2-cyanoethyl)-L-cysteine (2CyEMA) (Acrylonitrile)</b>                        |                                          |                |                                      |                |                                             |                |                                         |                |
| Mean                                                                                        | 162.1                                    | 149.8          | 141.2                                | 136.4          | 72.7                                        | 2.8*           | 27.1                                    | 3.9*           |
| (95% CI)                                                                                    | (137.3, 191.4)                           | (129.7, 173.1) | (122.7, 162.4)                       | (120.2, 154.7) | (33.9, 156.1)                               | (1.7, 4.6)     | (10.8, 68.1)                            | (1.9, 7.7)     |
| p-value                                                                                     |                                          | 0.40           |                                      | 0.56           |                                             | <.0001         |                                         | <.0001         |
| % change                                                                                    |                                          | -7.6%          |                                      | -3.4%          |                                             | -96.2%         |                                         | -85.8%         |
| <b>N-Acetyl-S-(3,4-dihydroxybutyl)-L-cysteine (34HBMA) (1,3 Butadiene)</b>                  |                                          |                |                                      |                |                                             |                |                                         |                |
| Mean                                                                                        | 543.7                                    | 516.8          | 530.1                                | 534.5*         | 452.1                                       | 338.6*         | 440.3                                   | 397.5*         |
| (95% CI)                                                                                    | (512.7, 576.5)                           | (483.0, 552.9) | (504.1, 557.5)                       | (505.2, 565.5) | (380.7, 536.9)                              | (299.4, 383.1) | (377.3, 513.8)                          | (349.8, 451.7) |
| p-value                                                                                     |                                          | 0.18           |                                      | 0.92           |                                             | 0.0007         |                                         | 0.20           |
| % change                                                                                    |                                          | -4.9%          |                                      | 0.8%           |                                             | -25.1%         |                                         | -9.7%          |
| <b>N-Acetyl-S-(2-carbamoyl-2-hydroxyethyl)-L-cysteine (2CaHEMA) (Acrylamide)</b>            |                                          |                |                                      |                |                                             |                |                                         |                |
| Mean                                                                                        | 18.7                                     | 17.9           | 19.2                                 | 19.3           | 17.8                                        | 14.4*          | 13.3                                    | 11.4*          |
| (95% CI)                                                                                    | (17.3, 20.2)                             | (16.4, 19.6)   | (17.7, 20.8)                         | (17.7, 21.0)   | (14.7, 21.6)                                | (10.7, 19.4)   | (10.2, 17.3)                            | (8.9, 14.5)    |
| p-value                                                                                     |                                          | 0.53           |                                      | 0.89           |                                             | 0.0058         |                                         | 0.18           |

|                                                                                                       | Exclusive Cigarette Smoking<br>(N = 273) |                  | Dual Cigarette/ENDS Use<br>(N = 242) |                  | Exclusive ENDS Use<br>(N = 30) <sup>†</sup> |                   | No Tobacco Use<br>(N = 31) <sup>†</sup> |                   |
|-------------------------------------------------------------------------------------------------------|------------------------------------------|------------------|--------------------------------------|------------------|---------------------------------------------|-------------------|-----------------------------------------|-------------------|
| Biomarker                                                                                             | Wave 1                                   | Wave 2           | Wave 1                               | Wave 2           | Wave 1                                      | Wave 2            | Wave 1                                  | Wave 2            |
| % change                                                                                              |                                          | -4.2%            |                                      | 0.3%             |                                             | -19.1%            |                                         | -14.4%            |
| <b>N-Acetyl-S-(2-hydroxyethyl)-L-cysteine (2HEMA) (Acrylonitrile, vinyl chloride, ethylene oxide)</b> |                                          |                  |                                      |                  |                                             |                   |                                         |                   |
| Mean                                                                                                  | 3.2                                      | 3.3              | 3.6                                  | 3.6              | 2.8                                         | 1.2* <sup>†</sup> | 1.7 <sup>†</sup>                        | 1.0* <sup>†</sup> |
| (95% CI)                                                                                              | (2.7, 3.9)                               | (2.9, 3.7)       | (3.1, 4.1)                           | (3.1, 4.2)       | (2.1, 3.8)                                  | (0.9, 1.7)        | (1.0, 2.8)                              | (0.8, 1.3)        |
| p-value                                                                                               |                                          | 0.40             |                                      | 0.87             |                                             | 0.0002            |                                         | 0.0014            |
| % change                                                                                              |                                          | 0.6%             |                                      | 1.4%             |                                             | -57.1%            |                                         | -42.6%            |
| <b>N-Acetyl-S-(2-hydroxypropyl)-L-cysteine (2HPMA) (Propylene Oxide)</b>                              |                                          |                  |                                      |                  |                                             |                   |                                         |                   |
| Mean                                                                                                  | 87.8                                     | 79.2             | 84.8                                 | 78.0             | 81.7                                        | 27.3*             | 58.8                                    | 36.7              |
| (95% CI)                                                                                              | (75.8, 101.8)                            | (68.8, 91.2)     | (74.0, 97.2)                         | (69.7, 87.2)     | (54.2, 123.2)                               | (21.5, 34.6)      | (37.6, 91.9)                            | (26.9, 50.0)      |
| p-value                                                                                               |                                          | 0.14             |                                      | 0.19             |                                             | 0.0002            |                                         | 0.0074            |
| % change                                                                                              |                                          | -9.8%            |                                      | -8.1%            |                                             | -66.6%            |                                         | -37.5%            |
| <b>N-Acetyl-S-(3-hydroxypropyl)-L-cysteine (3HPMA) (Acrolein)</b>                                     |                                          |                  |                                      |                  |                                             |                   |                                         |                   |
| Mean                                                                                                  | 1418.2                                   | 1450.6           | 1294.9                               | 1447.2           | 915.4                                       | 306.5*            | 664.5                                   | 363.9*            |
| (95% CI)                                                                                              | (1225.1, 1641.8)                         | (1274.9, 1650.5) | (1163.0, 1441.7)                     | (1291.3, 1622.0) | (659.7, 1270.2)                             | (231.0, 406.6)    | (431.0, 1024.4)                         | (260.1, 509.1)    |
| p-value                                                                                               |                                          | 0.23             |                                      | 0.046            |                                             | <.0001            |                                         | 0.013             |
| % change                                                                                              |                                          | 2.3%             |                                      | 11.8%            |                                             | -66.5%            |                                         | -45.2%            |
| <b>N-Acetyl-S-(3-hydroxypropyl-1-methyl)-L-cysteine (3HMPMA) (Crotonaldehyde)</b>                     |                                          |                  |                                      |                  |                                             |                   |                                         |                   |
| Mean                                                                                                  | 1698.5                                   | 1542.1           | 1551.3                               | 1522.3           | 879.8                                       | 227.7             | 645.2                                   | 301.2             |
| (95% CI)                                                                                              | (1505.4, 1916.5)                         | (1368.1, 1738.2) | (1398.5, 1720.7)                     | (1357.2, 1707.5) | (551.8, 1402.6)                             | (183.2, 283.0)    | (337.2, 1234.4)                         | (236.4, 383.6)    |
| p-value                                                                                               |                                          | 0.15             |                                      | 0.71             |                                             | <.0001            |                                         | 0.0082            |
| % change                                                                                              |                                          | -9.2%            |                                      | -1.8%            |                                             | -74.1%            |                                         | -53.3%            |
| <b>N-Acetyl-S-(4-hydroxy-2-methyl-2-buten-1-yl)-L-cysteine (4HMBEMA) (Isoprene)</b>                   |                                          |                  |                                      |                  |                                             |                   |                                         |                   |
| Mean                                                                                                  | 45.3                                     | 41.8             | 40.2                                 | 42.3             | 24.7                                        | 3.5               | 14.8                                    | 7.0               |
| (95% CI)                                                                                              | (38.9, 52.7)                             | (36.6, 47.8)     | (34.9, 46.4)                         | (36.1, 49.5)     | (16.4, 37.4)                                | (2.9, 4.2)        | (7.4, 29.6)                             | (4.4, 11.4)       |
| p-value                                                                                               |                                          | 0.43             |                                      | 0.53             |                                             | <.0001            |                                         | 0.0023            |
| % change                                                                                              |                                          | -7.6%            |                                      | 5.1%             |                                             | -85.8%            |                                         | -52.5%            |
| <b>Mandelic acid (MADA)</b>                                                                           |                                          |                  |                                      |                  |                                             |                   |                                         |                   |
| Mean                                                                                                  | 312.8                                    | 299.7*           | 282.2                                | 297.2*           | 244.7                                       | 116.3             | 198.5                                   | 159.2             |
| (95% CI)                                                                                              | (282.5, 346.4)                           | (274.8, 326.8)   | (261.5, 304.5)                       | (273.2, 323.5)   | (178.6, 335.2)                              | (76.7, 176.4)     | (148.2, 265.9)                          | (131.6, 192.7)    |
| p-value                                                                                               |                                          | 0.41             |                                      | 0.26             |                                             | 0.63              |                                         | 0.049             |
| % change                                                                                              |                                          | -4.2%            |                                      | 5.3%             |                                             | -52.5%            |                                         | -19.8%            |
| <b>N-Acetyl-S-(4-hydroxy-2-buten-1-yl)-L-cysteine (4HBeMA) (1,3 Butadiene)</b>                        |                                          |                  |                                      |                  |                                             |                   |                                         |                   |
| Mean                                                                                                  | 35.4                                     | 33.9             | 31.9                                 | 33.8             | 18.8                                        | 2.8*              | 13.0                                    | 5.6*              |
| (95% CI)                                                                                              | (30.4, 41.3)                             | (29.9, 38.4)     | (28.1, 36.1)                         | (29.9, 38.3)     | (10.8, 32.9)                                | (2.2, 3.7)        | (7.0, 24.1)                             | (4.2, 7.4)        |
| p-value                                                                                               |                                          | 0.77             |                                      | 0.34             |                                             | <.0001            |                                         | 0.0052            |

|                                                                         | Exclusive Cigarette Smoking<br>(N = 273) |                  | Dual Cigarette/ENDS Use<br>(N = 242) |                  | Exclusive ENDS Use<br>(N = 30) <sup>†</sup> |                  | No Tobacco Use<br>(N = 31) <sup>†</sup> |                  |
|-------------------------------------------------------------------------|------------------------------------------|------------------|--------------------------------------|------------------|---------------------------------------------|------------------|-----------------------------------------|------------------|
| Biomarker                                                               | Wave 1                                   | Wave 2           | Wave 1                               | Wave 2           | Wave 1                                      | Wave 2           | Wave 1                                  | Wave 2           |
| % change                                                                |                                          | -4.3%            |                                      | 6.2%             |                                             | -85.0%           |                                         | -57.2%           |
| <b>Phenylglyoxylic acid (PhGA) (Ethylbenzene, styrene)</b>              |                                          |                  |                                      |                  |                                             |                  |                                         |                  |
| Mean                                                                    | 438.0                                    | 422.1            | 393.5                                | 457.7*           | 396.8                                       | 240.7*           | 271.7                                   | 259.7            |
| (95% CI)                                                                | (400.7, 478.7)                           | (381.6, 466.9)   | (355.2, 436.0)                       | (426.9, 490.7)   | (318.2, 494.8)                              | (202.6, 285.9)   | (226.6, 325.8)                          | (221.5, 304.4)   |
| p-value                                                                 |                                          | 0.70             |                                      | 0.0038           |                                             | <.0001           |                                         | 0.59             |
| % change                                                                |                                          | -3.6%            |                                      | 16.3%            |                                             | -39.3%           |                                         | -4.4%            |
| <b>N-Acetyl-S-(phenyl)-L-cysteine (PhMA) (Benzene)</b>                  |                                          |                  |                                      |                  |                                             |                  |                                         |                  |
| Mean                                                                    | 1.1 <sup>†</sup>                         | 0.9 <sup>†</sup> | 1.1 <sup>†</sup>                     | 1.1 <sup>†</sup> | 1.0 <sup>†</sup>                            | 1.1 <sup>†</sup> | 1.1 <sup>†</sup>                        | 1.0 <sup>†</sup> |
| (95% CI)                                                                | (1.0, 1.2)                               | (0.8, 1.1)       | (1.0, 1.2)                           | (1.0, 1.2)       | (0.7, 1.4)                                  | (1.0, 1.3)       | (0.8, 1.5)                              | (0.7, 1.4)       |
| p-value                                                                 |                                          | 0.13             |                                      | 0.99             |                                             | 0.87             |                                         | 0.38             |
| % change                                                                |                                          | -13.2%           |                                      | 0.0%             |                                             | 10.8%            |                                         | -9.2%            |
| <b>2-Thioxothiazolidine-4-carboxylic acid (TTCA) (Carbon Disulfide)</b> |                                          |                  |                                      |                  |                                             |                  |                                         |                  |
| Mean                                                                    | 22.9                                     | 15.0*            | 23.8                                 | 19.1*            | 20.0                                        | 18.8             | 18.7                                    | 23.4             |
| (95% CI)                                                                | (20.0, 26.3)                             | (13.6, 16.6)     | (21.0, 27.1)                         | (16.1, 22.6)     | (13.6, 29.4)                                | (12.6, 28.3)     | (12.6, 27.9)                            | (13.9, 39.5)     |
| p-value                                                                 |                                          | <.0001           |                                      | 0.007            |                                             | 0.49             |                                         | 0.49             |
| % change                                                                |                                          | -34.7%           |                                      | -19.9%           |                                             | -5.9%            |                                         | 25.0%            |

Abbreviations: PATH – Population Assessment of Tobacco and Health, ENDS – electronic nicotine delivery system, CI – confidence interval. All estimates are weighted.

All geometric means are creatinine adjusted. P-values are for the Wave 1 to Wave 2 change in biomarker levels. % change indicates the Wave 1 to Wave 2 change in geometric mean by Wave 2 tobacco product use group.

\* Indicates a statistically significant change ( $p < 0.05$ ) in biomarker levels from Wave 1 to Wave 2.

<sup>†</sup> Estimate should be interpreted with caution because it has low statistical precision. The coefficient of variation of the estimate is larger than 30% or the sample size is <50.

§Concentrations of 1-NAP and 2-NAP are ug/g, all other polycyclic aromatic hydrocarbon biomarker concentrations are in ng/g.
